# Supplementary material for: The Effects of Irrigation, Genotype and Additives on Tef Silage Making
Source: MDPI journal article supplement (doi:10.3390/ani13030470), 2023-01-29
Supplement: s1 [file s1]

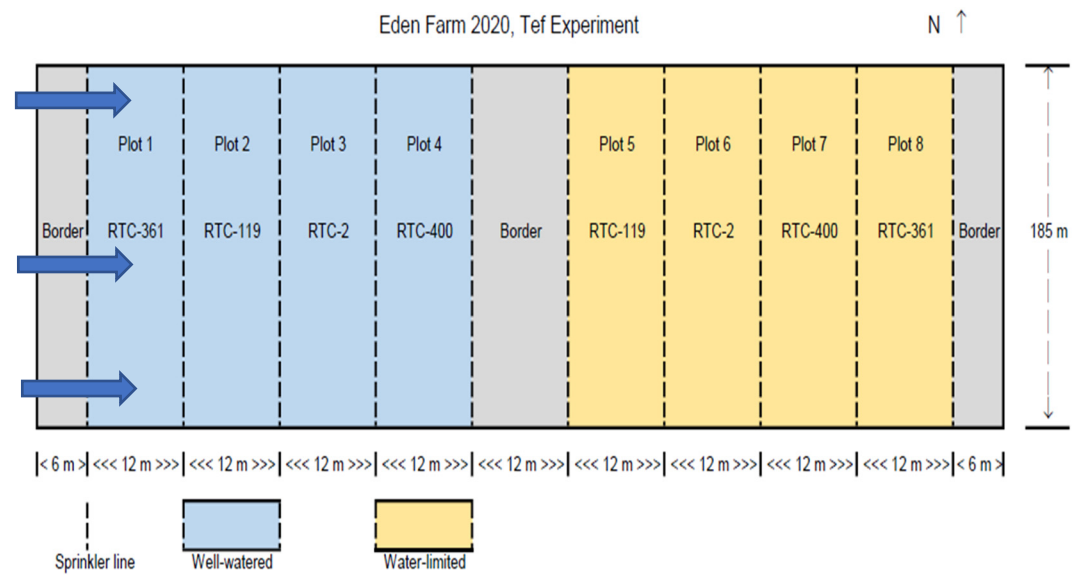

Figure S1: Field experimental design showing the different irrigation regimes; Well-watered (100% irrigation; light blue) and Water-limited (75% irrigation; yellow). Note: Each plot was sampled samples at 3 different location as indicated by the blue arrows.

**Table S1.** The effect of irrigation, genotype and additives on tef silage parameters at day 0 and 5 days after aerobic exposure.

| The effect of irrigation, genotype and additives on pH of tef silage at day 0 and 5 days after aerobic exposure    |                    |                    |                   |                     |                     |                   |                   |                   |                    |                           |                  |                  |                  |                      |                      |                       |                           |
|--------------------------------------------------------------------------------------------------------------------|--------------------|--------------------|-------------------|---------------------|---------------------|-------------------|-------------------|-------------------|--------------------|---------------------------|------------------|------------------|------------------|----------------------|----------------------|-----------------------|---------------------------|
| pH at day 0                                                                                                        |                    |                    |                   |                     |                     |                   |                   |                   |                    |                           |                  |                  |                  |                      |                      |                       |                           |
| Water-limited (75%)                                                                                                |                    |                    |                   |                     | Well-watered (100%) |                   |                   |                   |                    | Effect ( <i>P</i> -value) |                  |                  |                  |                      |                      |                       |                           |
| Genotype                                                                                                           | CTL <sup>1</sup>   | HI <sup>2</sup>    | MOL <sup>3</sup>  | MOL+HI <sup>4</sup> | SEM                 | CTL               | HI                | MOL               | MOL+HI             | SEM                       | Irr <sup>5</sup> | Gen <sup>6</sup> | Add <sup>7</sup> | IrrxGen <sup>8</sup> | IrrxAdd <sup>9</sup> | GenxAdd <sup>10</sup> | IrrxGenxAdd <sup>11</sup> |
| RTC-2                                                                                                              | 4.3*               | 4.2*               | 4.1*              | 4.2*                | 0.03                | 5.9 <sup>a</sup>  | 6.0 <sup>a</sup>  | 6.1 <sup>a</sup>  | 5.0 <sup>b</sup>   | 0.14                      | <.0001           | <.0001           | 0.0004           | <.0001               | 0.0005               | 0.0014                | <.0001                    |
| RTC-119                                                                                                            | 4.3                | 4.6                | 4.5               | 4.5                 | 0.05                | 4.6               | 4.4               | 4.4               | 4.3                | 0.05                      |                  |                  |                  |                      |                      |                       |                           |
| RTC-361                                                                                                            | 4.2*               | 4.2*               | 4.1               | 4.0*                | 0.02                | 4.8               | 4.7               | 4.5               | 4.8                | 0.05                      |                  |                  |                  |                      |                      |                       |                           |
| RTC-400                                                                                                            | 4.1*               | 4.1                | 4.0               | 4.1                 | 0.02                | 4.7               | 4.5               | 4.4               | 4.4                | 0.04                      |                  |                  |                  |                      |                      |                       |                           |
| pH at day 5                                                                                                        |                    |                    |                   |                     |                     |                   |                   |                   |                    |                           |                  |                  |                  |                      |                      |                       |                           |
| Water-limited (75%)                                                                                                |                    |                    |                   |                     | Well-watered (100%) |                   |                   |                   |                    | Effect ( <i>P</i> -value) |                  |                  |                  |                      |                      |                       |                           |
| Genotype                                                                                                           | CTL <sup>1</sup>   | HI <sup>2</sup>    | MOL <sup>3</sup>  | MOL+HI <sup>4</sup> | SEM                 | CTL               | HI                | MOL               | MOL+HI             | SEM                       | Irr <sup>5</sup> | Gen <sup>6</sup> | Add <sup>7</sup> | IrrxGen <sup>8</sup> | IrrxAdd <sup>9</sup> | GenxAdd <sup>10</sup> | IrrxGenxAdd <sup>11</sup> |
| RTC-2                                                                                                              | 4.3*               | 4.2*               | 4.0*              | 4.1*                | 0.05                | 5.6 <sup>a</sup>  | 5.0 <sup>a</sup>  | 5.7 <sup>a</sup>  | 4.9 <sup>b</sup>   | 0.11                      | <.0001           | <.0001           | 0.004            | <.0001               | 0.0038               | 0.0017                | 0.0015                    |
| RTC-119                                                                                                            | 4.3                | 4.5                | 4.4               | 4.4                 | 0.04                | 4.5               | 4.3               | 4.7               | 4.2                | 0.10                      |                  |                  |                  |                      |                      |                       |                           |
| RTC-361                                                                                                            | 4.1*               | 4.0*               | 4.0*              | 3.9*                | 0.02                | 4.8               | 4.8               | 4.7               | 4.9                | 0.04                      |                  |                  |                  |                      |                      |                       |                           |
| RTC-400                                                                                                            | 4.0                | 4.0                | 3.9               | 4.1                 | 0.03                | 4.4               | 4.5               | 4.3               | 4.3                | 0.02                      |                  |                  |                  |                      |                      |                       |                           |
| The effect of irrigation, genotype and additives on IVDMD of tef silage at day 0 and 5 days after aerobic exposure |                    |                    |                   |                     |                     |                   |                   |                   |                    |                           |                  |                  |                  |                      |                      |                       |                           |
| IVDMD (%) at day 0                                                                                                 |                    |                    |                   |                     |                     |                   |                   |                   |                    |                           |                  |                  |                  |                      |                      |                       |                           |
| Water-limited (75%)                                                                                                |                    |                    |                   |                     | Well-watered (100%) |                   |                   |                   |                    | Effect ( <i>P</i> -value) |                  |                  |                  |                      |                      |                       |                           |
| Genotype                                                                                                           | CTL <sup>1</sup>   | HI <sup>2</sup>    | MOL <sup>3</sup>  | MOL+HI <sup>4</sup> | SEM                 | CTL               | HI                | MOL               | MOL+HI             | SEM                       | Irr <sup>5</sup> | Gen <sup>6</sup> | Add <sup>7</sup> | IrrxGen <sup>8</sup> | IrrxAdd <sup>9</sup> | GenxAdd <sup>10</sup> | IrrxGenxAdd <sup>11</sup> |
| RTC-2                                                                                                              | 68.9 <sup>ab</sup> | 71.7 <sup>a*</sup> | 57.4 <sup>b</sup> | 72.1 <sup>a*</sup>  | 2.3                 | 58.0              | 54.8              | 57.3              | 54.3               | 0.94                      | <.0001           | <.0001           | 0.0231           | <.0001               | 0.1062               | <.0001                | 0.0004                    |
| RTC-119                                                                                                            | 58.5               | 50.0               | 60.7              | 62.2                | 1.8                 | 55.2              | 53.6              | 54.3              | 66.7               | 1.64                      |                  |                  |                  |                      |                      |                       |                           |
| RTC-361                                                                                                            | 61.9               | 57.7               | 66.1              | 67.9*               | 1.5                 | 57.5              | 57.0              | 60.1              | 53.9               | 0.80                      |                  |                  |                  |                      |                      |                       |                           |
| RTC-400                                                                                                            | 61.5               | 62.0               | 69.8              | 62.4                | 1.1                 | 55.2 <sup>b</sup> | 70.4 <sup>a</sup> | 68.8 <sup>a</sup> | 62.6 <sup>ab</sup> | 2.01                      |                  |                  |                  |                      |                      |                       |                           |
| IVDMD (%) at day 5                                                                                                 |                    |                    |                   |                     |                     |                   |                   |                   |                    |                           |                  |                  |                  |                      |                      |                       |                           |
| Water-limited (75%)                                                                                                |                    |                    |                   |                     | Well-watered (100%) |                   |                   |                   |                    | Effect ( <i>P</i> -value) |                  |                  |                  |                      |                      |                       |                           |
| Genotype                                                                                                           | CTL <sup>1</sup>   | HI <sup>2</sup>    | MOL <sup>3</sup>  | MOL+HI <sup>4</sup> | SEM                 | CTL               | HI                | MOL               | MOL+HI             | SEM                       | Irr <sup>5</sup> | Gen <sup>6</sup> | Add <sup>7</sup> | IrrxGen <sup>8</sup> | IrrxAdd <sup>9</sup> | GenxAdd <sup>10</sup> | IrrxGenxAdd <sup>11</sup> |
| RTC-2                                                                                                              | 74.3*              | 75.4*              | 66.5*             | 72.9*               | 2.1                 | 54.9              | 43.4              | 48.8              | 48.0               | 1.46                      | <.0001           | <.0001           | 0.0323           | <.0001               | 0.7758               | 0.5249                | 0.0008                    |
| RTC-119                                                                                                            | 52.9               | 47.1               | 61.2              | 52.3                | 2.0                 | 53.5              | 50.6              | 50.3              | 62.0               | 1.84                      |                  |                  |                  |                      |                      |                       |                           |

|         |      |      |      |       |     |      |      |        |      |      |
|---------|------|------|------|-------|-----|------|------|--------|------|------|
| RTC-361 | 58.1 | 53.0 | 55.3 | 61.1* | 1.6 | 45.2 | 42.5 | 43.7   | 42.4 | 0.86 |
| RTC-400 | 64.3 | 51.2 | 52.5 | 57.7  | 1.7 | 58.8 | 64.1 | 64.737 | 59.7 | 1.59 |

### The effect of irrigation, genotype and additives on lactic acid bacteria count of tef silage at day 0

#### LAB (log<sub>10</sub> CFU g/DM)

| Genotype | Water-limited (75%) |                   |                  |                     |      | Well-watered (100%) |      |      |        |      | Effect ( <i>P</i> -value) |                  |                  |                      |                      |                       |                           |
|----------|---------------------|-------------------|------------------|---------------------|------|---------------------|------|------|--------|------|---------------------------|------------------|------------------|----------------------|----------------------|-----------------------|---------------------------|
|          | CTL <sup>1</sup>    | HI <sup>2</sup>   | MOL <sup>3</sup> | MOL+HI <sup>4</sup> | SEM  | CTL                 | HI   | MOL  | MOL+HI | SEM  | Irr <sup>5</sup>          | Gen <sup>6</sup> | Add <sup>7</sup> | IrrxGen <sup>8</sup> | IrrxAdd <sup>9</sup> | GenxAdd <sup>10</sup> | IrrxGenxAdd <sup>11</sup> |
| RTC-2    | 9.8                 | 9.8               | 9.7              | 9.8                 | 0.03 | 10.7                | 10.6 | 10.8 | 11.0   | 0.08 | <.0001                    | <.0001           | 0.0109           | <.0001               | 0.0044               | <.0001                | 0.0002                    |
| RTC-119  | 9.9                 | 9.3               | 9.9              | 9.8                 | 0.11 | 10.5                | 10.3 | 10.5 | 10.5   | 0.09 |                           |                  |                  |                      |                      |                       |                           |
| RTC-361  | 9.6 <sup>a</sup>    | 10.0 <sup>a</sup> | N.D <sup>b</sup> | 4.0 <sup>b</sup>    | 1.74 | 10.8                | 10.9 | 10.8 | 10.8   | 0.02 |                           |                  |                  |                      |                      |                       |                           |
| RTC-400  | 9.3                 | 9.8               | 9.7              | 10.0                | 0.10 | 9.8                 | 9.9  | 10.1 | 10.1   | 0.04 |                           |                  |                  |                      |                      |                       |                           |

### The effect of additives on the VFA profile of tef silage at day 0 and 5 days after aerobic exposure

#### VFA (g/100g DM) at day 0

| VFA            | Additive          |                    |                    |                     |       | Effect ( <i>P</i> -value) |                  |                  |                      |                      |                       |                           |
|----------------|-------------------|--------------------|--------------------|---------------------|-------|---------------------------|------------------|------------------|----------------------|----------------------|-----------------------|---------------------------|
|                | CTL <sup>1</sup>  | HI <sup>2</sup>    | MOL <sup>3</sup>   | MOL+HI <sup>4</sup> | SEM   | Irr <sup>5</sup>          | Gen <sup>6</sup> | Add <sup>7</sup> | IrrxGen <sup>8</sup> | IrrxAdd <sup>9</sup> | GenxAdd <sup>10</sup> | IrrxGenxAdd <sup>11</sup> |
| Ethanol        | 0.02              | 0.02               | 0.02               | 0.04                | 0.004 | 0.1090                    | 0.5888           | 0.2772           | 0.0109               | 0.5860               | 0.9206                | 0.9366                    |
| Acetic acid    | 0.51              | 0.90               | 0.69               | 0.87                | 0.057 | 0.4397                    | 0.2055           | 0.0448           | 0.0136               | 0.8742               | 0.3897                | 0.4265                    |
| Propionic acid | N.D               | 0.01               | 0.03               | 0.15                | 0.028 | 0.1548                    | 0.0310           | 0.2195           | 0.1055               | 0.2426               | 0.1085                | 0.1277                    |
| Butyric acid   | 0.01              | N.D                | 0.01               | N.D                 | 0.002 | 0.1259                    | 0.0839           | 0.1079           | 0.0019               | 0.1715               | 0.0398                | 0.0587                    |
| Total          | 0.54 <sup>b</sup> | 0.94 <sup>ab</sup> | 0.76 <sup>ab</sup> | 1.06 <sup>a</sup>   | 0.060 | 0.9005                    | 0.9420           | 0.0229           | 0.0966               | 0.5389               | 0.6255                | 0.7418                    |

#### VFA (g/100g DM) at day 5

| VFA            | Additive          |                  |                    |                     |       | Effect ( <i>P</i> -value) |                  |                  |                      |                      |                       |                           |
|----------------|-------------------|------------------|--------------------|---------------------|-------|---------------------------|------------------|------------------|----------------------|----------------------|-----------------------|---------------------------|
|                | CTL <sup>1</sup>  | HI <sup>2</sup>  | MOL <sup>3</sup>   | MOL+HI <sup>4</sup> | SEM   | Irr <sup>5</sup>          | Gen <sup>6</sup> | Add <sup>7</sup> | IrrxGen <sup>8</sup> | IrrxAdd <sup>9</sup> | GenxAdd <sup>10</sup> | IrrxGenxAdd <sup>11</sup> |
| Ethanol        | N.D               | N.D              | N.D                | N.D                 | 0.000 | 0.5844                    | 0.8346           | 0.8148           | 0.8346               | 0.8148               | 0.9646                | 0.9646                    |
| Acetic acid    | 0.32              | 0.39             | 0.48               | 0.33                | 0.048 | 0.0517                    | 0.0704           | 0.56             | 0.0328               | 0.2638               | 0.5222                | 0.3212                    |
| Propionic acid | 0.20 <sup>a</sup> | N.D <sup>b</sup> | 0.12 <sup>ab</sup> | N.D <sup>b</sup>    | 0.036 | 0.0006                    | 0.0034           | 0.0033           | 0.0034               | 0.0033               | <.0001                | <.0001                    |
| Butyric acid   | 0.02              | 0.16             | 0.03               | 0.13                | 0.024 | 0.1721                    | 0.2130           | 0.0918           | 0.7556               | 0.1026               | 0.4043                | 0.068                     |
| Total          | 0.55              | 0.54             | 0.62               | 0.46                | 0.055 | 0.6078                    | 0.2312           | 0.729            | 0.1647               | 0.5983               | 0.0403                | 0.0056                    |

### The effect of irrigation, genotype and additives on lactic acid concentration of tef silage at day 0 and 5 days after aerobic exposure

#### Lactic acid concentration (g/100g DM) at day 0

| Genotype | Water-limited (75%) |                  |                  |                     |      | Well-watered (100%) |     |     |        |      | Effect ( <i>P</i> -value) |                  |                  |                      |                      |                       |                           |
|----------|---------------------|------------------|------------------|---------------------|------|---------------------|-----|-----|--------|------|---------------------------|------------------|------------------|----------------------|----------------------|-----------------------|---------------------------|
|          | CTL <sup>1</sup>    | HI <sup>2</sup>  | MOL <sup>3</sup> | MOL+HI <sup>4</sup> | SEM  | CTL                 | HI  | MOL | MOL+HI | SEM  | Irr <sup>5</sup>          | Gen <sup>6</sup> | Add <sup>7</sup> | IrrxGen <sup>8</sup> | IrrxAdd <sup>9</sup> | GenxAdd <sup>10</sup> | IrrxGenxAdd <sup>11</sup> |
| RTC-2    | 0.2                 | 0.2              | 0.2              | 0.3                 | 0.04 | 0.7                 | 0.2 | 0.1 | 0.2    | 0.11 | 0.1711                    | 0.0001           | 0.1986           | 0.0019               | 0.738                | 0.8335                | 0.0005                    |
| RTC-119  | 1.5 <sup>a</sup>    | 0.6 <sup>b</sup> | 0.6 <sup>b</sup> | 0.003 <sup>c</sup>  | 0.20 | 0.1                 | 0.3 | 0.4 | 0.7    | 0.08 |                           |                  |                  |                      |                      |                       |                           |
| RTC-361  | 0.3                 | 0.7              | 0.5              | 0.7                 | 0.06 | 0.9                 | 0.3 | 0.7 | 0.4    | 0.10 |                           |                  |                  |                      |                      |                       |                           |
| RTC-400  | 0.4                 | 0.3              | 0.5              | 0.7                 | 0.07 | 1.1                 | 1.0 | 1.1 | 1.0    | 0.09 |                           |                  |                  |                      |                      |                       |                           |

#### Lactic acid concentration (g/100g DM) at day 5

| Genotype | Water-limited (75%) |                 |                  |                     |      | Well-watered (100%) |     |     |        |      | Effect ( <i>P</i> -value) |                  |                  |                      |                      |                       |                           |
|----------|---------------------|-----------------|------------------|---------------------|------|---------------------|-----|-----|--------|------|---------------------------|------------------|------------------|----------------------|----------------------|-----------------------|---------------------------|
|          | CTL <sup>1</sup>    | HI <sup>2</sup> | MOL <sup>3</sup> | MOL+HI <sup>4</sup> | SEM  | CTL                 | HI  | MOL | MOL+HI | SEM  | Irr <sup>5</sup>          | Gen <sup>6</sup> | Add <sup>7</sup> | IrrxGen <sup>8</sup> | IrrxAdd <sup>9</sup> | GenxAdd <sup>10</sup> | IrrxGenxAdd <sup>11</sup> |
| RTC-2    | 1.2                 | 0.7             | 2.7              | 0.8                 | 0.42 | 0.3                 | 0.8 | 1.0 | 0.7    | 0.14 | <.0001                    | 0.0035           | 0.0058           | 0.0023               | 0.0817               | 0.6464                | 0.511                     |
| RTC-119  | 1.0                 | 0.4             | 0.7              | 0.4                 | 0.10 | 0.3                 | 0.5 | 0.9 | 1.1    | 0.15 |                           |                  |                  |                      |                      |                       |                           |
| RTC-361  | 2.2                 | 1.3             | 5.2 <sup>*</sup> | 2.3                 | 0.82 | 0.4                 | 0.2 | 0.4 | 0.2    | 0.05 |                           |                  |                  |                      |                      |                       |                           |
| RTC-400  | 3.2                 | 1.6             | 3.0              | 1.4                 | 0.37 | 1.1                 | 1.6 | 2.1 | 0.9    | 0.32 |                           |                  |                  |                      |                      |                       |                           |

#### The effect of irrigation, genotype and additives on WSC of tef silage at day 0 and 5 days after aerobic exposure

##### Water Soluble Carbohydrates (g/100g DM) at day 0

| Genotype | Water-limited (75%) |                   |                    |                     |      | Well-watered (100%) |                   |                   |                   |      | Effect ( <i>P</i> -value) |                  |                  |                      |                      |                       |                           |
|----------|---------------------|-------------------|--------------------|---------------------|------|---------------------|-------------------|-------------------|-------------------|------|---------------------------|------------------|------------------|----------------------|----------------------|-----------------------|---------------------------|
|          | CTL <sup>1</sup>    | HI <sup>2</sup>   | MOL <sup>3</sup>   | MOL+HI <sup>4</sup> | SEM  | CTL                 | HI                | MOL               | MOL+HI            | SEM  | Irr <sup>5</sup>          | Gen <sup>6</sup> | Add <sup>7</sup> | IrrxGen <sup>8</sup> | IrrxAdd <sup>9</sup> | GenxAdd <sup>10</sup> | IrrxGenxAdd <sup>11</sup> |
| RTC-2    | 0.13                | 0.02              | 0.06               | 0.02                | 0.03 | 0.04                | 0.02              | 0.07              | 0.11              | 0.02 | 0.0453                    | <.0001           | <.0001           | 0.0009               | 0.0001               | <.0001                | 0.0348                    |
| RTC-119  | 0.08                | 0.06              | 0.03               | 0.03                | 0.01 | 0.02                | 0.03              | 0.06              | 0.05              | 0.01 |                           |                  |                  |                      |                      |                       |                           |
| RTC-361  | 0.11                | 0.02              | 0.10               | 0.04                | 0.02 | 0.10                | 0.12              | 0.08              | 0.05              | 0.01 |                           |                  |                  |                      |                      |                       |                           |
| RTC-400  | 0.56 <sup>a</sup>   | 0.03 <sup>c</sup> | 0.17 <sup>bc</sup> | 0.04 <sup>c</sup>   | 0.08 | 0.25 <sup>a</sup>   | 0.03 <sup>b</sup> | 0.05 <sup>b</sup> | 0.04 <sup>b</sup> | 0.03 |                           |                  |                  |                      |                      |                       |                           |

##### Water Soluble Carbohydrates (g/100g DM) at day 5

| Genotype | Water-limited (75%) |                  |                  |                     |      | Well-watered (100%) |                  |                  |                  |      | Effect ( <i>P</i> -value) |                  |                  |                      |                      |                       |                           |
|----------|---------------------|------------------|------------------|---------------------|------|---------------------|------------------|------------------|------------------|------|---------------------------|------------------|------------------|----------------------|----------------------|-----------------------|---------------------------|
|          | CTL <sup>1</sup>    | HI <sup>2</sup>  | MOL <sup>3</sup> | MOL+HI <sup>4</sup> | SEM  | CTL                 | HI               | MOL              | MOL+HI           | SEM  | Irr <sup>5</sup>          | Gen <sup>6</sup> | Add <sup>7</sup> | IrrxGen <sup>8</sup> | IrrxAdd <sup>9</sup> | GenxAdd <sup>10</sup> | IrrxGenxAdd <sup>11</sup> |
| RTC-2    | 0.5 <sup>a</sup>    | 0.1 <sup>b</sup> | 0.2 <sup>b</sup> | 0.03 <sup>b</sup>   | 0.07 | 0.1                 | 0.01             | 0.1              | 0.1              | 0.01 | <.0001                    | <.0001           | <.0001           | 0.0017               | <.0001               | <.0001                | 0.0043                    |
| RTC-119  | 0.1                 | 0.01             | 0.02             | 0.04                | 0.01 | 0.1                 | 0.1              | 0.1              | 0.1              | 0.01 |                           |                  |                  |                      |                      |                       |                           |
| RTC-361  | 0.3                 | 0.1              | 0.2              | 0.3                 | 0.04 | 0.1                 | 0.2              | 0.1              | 0.1              | 0.02 |                           |                  |                  |                      |                      |                       |                           |
| RTC-400  | 0.5 <sup>a</sup>    | 0.1 <sup>b</sup> | 0.2 <sup>b</sup> | 0.1 <sup>b</sup>    | 0.06 | 0.3 <sup>a</sup>    | 0.1 <sup>b</sup> | 0.1 <sup>b</sup> | 0.1 <sup>b</sup> | 0.02 |                           |                  |                  |                      |                      |                       |                           |

#### The effect of irrigation, genotype and additives on ammonia nitrogen of tef silage at day 0 and 5 days after aerobic exposure

##### Ammonia nitrogen concentration (mg/dL) at day 0

| Genotype | Water-limited (75%) |                 |                  |                     |     | Well-watered (100%) |    |     |        |     | Effect ( <i>P</i> -value) |                  |                  |                      |                      |                       |                           |
|----------|---------------------|-----------------|------------------|---------------------|-----|---------------------|----|-----|--------|-----|---------------------------|------------------|------------------|----------------------|----------------------|-----------------------|---------------------------|
|          | CTL <sup>1</sup>    | HI <sup>2</sup> | MOL <sup>3</sup> | MOL+HI <sup>4</sup> | SEM | CTL                 | HI | MOL | MOL+HI | SEM | Irr <sup>5</sup>          | Gen <sup>6</sup> | Add <sup>7</sup> | IrrxGen <sup>8</sup> | IrrxAdd <sup>9</sup> | GenxAdd <sup>10</sup> | IrrxGenxAdd <sup>11</sup> |

| Genotype | CTL <sup>1</sup> | HI <sup>2</sup> | MOL <sup>3</sup> | MOL+HI <sup>4</sup> | SEM  | CTL               | HI                | MOL               | MOL+HI           | SEM  | Irr <sup>5</sup> | Gen <sup>6</sup> | Add <sup>7</sup> | IrrxGen <sup>8</sup> | IrrxAdd <sup>9</sup> | GenxAdd <sup>10</sup> | IrrxGenxAdd <sup>11</sup> |
|----------|------------------|-----------------|------------------|---------------------|------|-------------------|-------------------|-------------------|------------------|------|------------------|------------------|------------------|----------------------|----------------------|-----------------------|---------------------------|
| RTC-2    | 4.1*             | 4.5             | 5.0              | 0.7                 | 0.81 | 10.5 <sup>a</sup> | 8.9 <sup>ab</sup> | 9.4 <sup>ab</sup> | 1.6 <sup>c</sup> | 1.28 | 0.0029           | 0.0317           | 0.0608           | 0.0334               | 0.0174               | 0.0082                | 0.4183                    |
| RTC-119  | 4.2              | 3.5             | 2.3              | 3.8                 | 0.40 | 5.4               | 6.2               | 3.5               | 1.2              | 0.76 |                  |                  |                  |                      |                      |                       |                           |
| RTC-361  | 3.2              | 3.0             | 2.5              | 4.2                 | 0.40 | 2.1               | 6.1               | 7.3               | 4.7              | 0.65 |                  |                  |                  |                      |                      |                       |                           |
| RTC-400  | 2.4              | 3.0             | 3.2              | 6.3                 | 0.63 | 2.9               | 2.5               | 4.2               | 3.5              | 0.38 |                  |                  |                  |                      |                      |                       |                           |

#### Ammonia nitrogen concentration (mg/dL) at day 5

| Water-limited (75%) |                  |                 |                  |                     |      | Well-watered (100%) |     |     |        |      | Effect ( <i>P</i> -value) |                  |                  |                      |                      |                       |                           |
|---------------------|------------------|-----------------|------------------|---------------------|------|---------------------|-----|-----|--------|------|---------------------------|------------------|------------------|----------------------|----------------------|-----------------------|---------------------------|
| Genotype            | CTL <sup>1</sup> | HI <sup>2</sup> | MOL <sup>3</sup> | MOL+HI <sup>4</sup> | SEM  | CTL                 | HI  | MOL | MOL+HI | SEM  | Irr <sup>5</sup>          | Gen <sup>6</sup> | Add <sup>7</sup> | IrrxGen <sup>8</sup> | IrrxAdd <sup>9</sup> | GenxAdd <sup>10</sup> | IrrxGenxAdd <sup>11</sup> |
| RTC-2               | 3.2*             | 4.1             | 3.2              | 0.9                 | 0.58 | 9.6                 | 9.4 | 9.0 | 4.7    | 0.77 | <.0001                    | 0.0245           | 0.6911           | 0.0253               | 0.7688               | 0.3612                | 0.4910                    |
| RTC-119             | 4.2              | 3.0             | 1.6              | 1.8                 | 0.41 | 3.1                 | 4.4 | 3.7 | 5.2    | 0.79 |                           |                  |                  |                      |                      |                       |                           |
| RTC-361             | 1.2              | 1.4             | 2.5              | 2.6                 | 0.34 | 6.9                 | 5.7 | 7.7 | 3.9    | 0.61 |                           |                  |                  |                      |                      |                       |                           |
| RTC-400             | 0.4              | 3.5             | 3.0              | 3.1                 | 0.63 | 4.6                 | 3.8 | 3.2 | 4.9    | 0.40 |                           |                  |                  |                      |                      |                       |                           |

#### The effect of irrigation, genotype and additives on OM content of tef silage at day 0 and day 5 of aerobic exposure

##### Organic Matter content (%) at day 0

| Water-limited (75%) |                  |                 |                  |                     |      | Well-watered (100%) |                   |                   |                    |      | Effect ( <i>P</i> -value) |                  |                  |                      |                      |                       |                           |
|---------------------|------------------|-----------------|------------------|---------------------|------|---------------------|-------------------|-------------------|--------------------|------|---------------------------|------------------|------------------|----------------------|----------------------|-----------------------|---------------------------|
| Genotype            | CTL <sup>1</sup> | HI <sup>2</sup> | MOL <sup>3</sup> | MOL+HI <sup>4</sup> | SEM  | CTL                 | HI                | MOL               | MOL+HI             | SEM  | Irr <sup>5</sup>          | Gen <sup>6</sup> | Add <sup>7</sup> | IrrxGen <sup>8</sup> | IrrxAdd <sup>9</sup> | GenxAdd <sup>10</sup> | IrrxGenxAdd <sup>11</sup> |
| RTC-2               | 90.7*            | 90.4            | 90.0             | 90.0                | 0.12 | 88.4                | 88.1              | 88.0              | 88.7               | 0.16 | <.0001                    | <.0001           | 0.0029           | <.0001               | 0.7910               | 0.1645                | 0.1082                    |
| RTC-119             | 89.8             | 89.2            | 89.0             | 90.2                | 0.20 | 90.3                | 90.4              | 89.7              | 90.3               | 0.19 |                           |                  |                  |                      |                      |                       |                           |
| RTC-361             | 91.5*            | 90.6            | 90.5             | 90.1                | 0.25 | 88.8                | 89.3              | 89.3              | 88.9               | 0.14 |                           |                  |                  |                      |                      |                       |                           |
| RTC-400             | 92.0*            | 91.8*           | 91.4             | 91.3                | 0.14 | 89.9 <sup>a</sup>   | 89.2 <sup>a</sup> | 87.9 <sup>b</sup> | 88.1 <sup>ab</sup> | 0.26 |                           |                  |                  |                      |                      |                       |                           |

##### Organic Matter content (%) at day 5

| Water-limited (75%) |                  |                 |                  |                     |      | Well-watered (100%) |      |      |        |      | Effect ( <i>P</i> -value) |                  |                  |                      |                      |                       |                           |
|---------------------|------------------|-----------------|------------------|---------------------|------|---------------------|------|------|--------|------|---------------------------|------------------|------------------|----------------------|----------------------|-----------------------|---------------------------|
| Genotype            | CTL <sup>1</sup> | HI <sup>2</sup> | MOL <sup>3</sup> | MOL+HI <sup>4</sup> | SEM  | CTL                 | HI   | MOL  | MOL+HI | SEM  | Irr <sup>5</sup>          | Gen <sup>6</sup> | Add <sup>7</sup> | IrrxGen <sup>8</sup> | IrrxAdd <sup>9</sup> | GenxAdd <sup>10</sup> | IrrxGenxAdd <sup>11</sup> |
| RTC-2               | 92.0*            | 91.6*           | 91.0*            | 91.6                | 0.18 | 89.0                | 88.9 | 88.3 | 89.3   | 0.22 | <.0001                    | <.0001           | 0.0672           | <.0001               | 0.5623               | 0.4956                | 0.9935                    |
| RTC-119             | 90.0             | 89.2            | 89.6             | 89.4                | 0.17 | 90.3                | 90.2 | 90.8 | 89.6   | 0.21 |                           |                  |                  |                      |                      |                       |                           |
| RTC-361             | 91.1             | 90.7            | 90.8             | 90.8                | 0.12 | 89.1                | 88.9 | 88.9 | 88.9   | 0.14 |                           |                  |                  |                      |                      |                       |                           |
| RTC-400             | 92.8*            | 92.0            | 91.8             | 91.8                | 0.19 | 90.4                | 90.3 | 89.9 | 89.7   | 0.18 |                           |                  |                  |                      |                      |                       |                           |

#### The effect of irrigation, genotype and additives on Crude Protein content on tef silage at day 0 and 5 days after aerobic exposure

##### Crude Protein Content (%) at Day 0

| Water-limited (75%) |                  |                 |                  |                     |     | Well-watered (100%) |    |     |        |     | Effect ( <i>P</i> -value) |                  |                  |                      |                      |                       |                           |
|---------------------|------------------|-----------------|------------------|---------------------|-----|---------------------|----|-----|--------|-----|---------------------------|------------------|------------------|----------------------|----------------------|-----------------------|---------------------------|
| Genotype            | CTL <sup>1</sup> | HI <sup>2</sup> | MOL <sup>3</sup> | MOL+HI <sup>4</sup> | SEM | CTL                 | HI | MOL | MOL+HI | SEM | Irr <sup>5</sup>          | Gen <sup>6</sup> | Add <sup>7</sup> | IrrxGen <sup>8</sup> | IrrxAdd <sup>9</sup> | GenxAdd <sup>10</sup> | IrrxGenxAdd <sup>11</sup> |

|         |       |      |      |      |      |      |      |      |      |      |        |        |        |        |        |        |        |
|---------|-------|------|------|------|------|------|------|------|------|------|--------|--------|--------|--------|--------|--------|--------|
| RTC-2   | 15.8  | 15.8 | 15.7 | 16.9 | 0.24 | 13.9 | 13.3 | 13.8 | 14.2 | 0.16 | <.0001 | <.0001 | 0.0315 | <.0001 | 0.6669 | 0.4151 | 0.2660 |
| RTC-119 | 12.2  | 12.8 | 11.4 | 12.3 | 0.23 | 14.0 | 13.3 | 12.3 | 14.0 | 0.30 |        |        |        |        |        |        |        |
| RTC-361 | 14.9  | 14.5 | 15.5 | 15.0 | 0.25 | 14.6 | 14.8 | 13.3 | 14.5 | 0.20 |        |        |        |        |        |        |        |
| RTC-400 | 14.8* | 15.0 | 15.0 | 16.0 | 0.24 | 12.0 | 12.6 | 12.7 | 12.7 | 0.24 |        |        |        |        |        |        |        |

#### Crude Protein Content (%) at Day 5

| Genotype | Water-limited (75%) |                 |                  |                     |      | Well-watered (100%) |      |      |        |      | Effect ( <i>P</i> -value) |                  |                  |                      |                      |                       |                           |
|----------|---------------------|-----------------|------------------|---------------------|------|---------------------|------|------|--------|------|---------------------------|------------------|------------------|----------------------|----------------------|-----------------------|---------------------------|
|          | CTL <sup>1</sup>    | HI <sup>2</sup> | MOL <sup>3</sup> | MOL+HI <sup>4</sup> | SEM  | CTL                 | HI   | MOL  | MOL+HI | SEM  | Irr <sup>5</sup>          | Gen <sup>6</sup> | Add <sup>7</sup> | IrrxGen <sup>8</sup> | IrrxAdd <sup>9</sup> | GenxAdd <sup>10</sup> | IrrxGenxAdd <sup>11</sup> |
| RTC-2    | 14.9                | 16.0            | 16.2             | 15.6                | 0.30 | 14.8                | 14.7 | 15.7 | 16.2   | 0.26 | 0.0190                    | <.0001           | 0.0181           | 0.0004               | 0.6678               | 0.9110                | 0.6697                    |
| RTC-119  | 12.2                | 12.7            | 11.9             | 13.0                | 0.22 | 12.9                | 12.9 | 13.8 | 13.1   | 0.13 |                           |                  |                  |                      |                      |                       |                           |
| RTC-361  | 13.5                | 14.6            | 14.3             | 13.7                | 0.30 | 13.1                | 13.9 | 13.7 | 13.7   | 0.16 |                           |                  |                  |                      |                      |                       |                           |
| RTC-400  | 13.8                | 15.3            | 15.9             | 15.2                | 0.32 | 12.9                | 13.6 | 13.1 | 13.2   | 0.30 |                           |                  |                  |                      |                      |                       |                           |

#### The effect of irrigation, genotype and additives on NDF content of tef silage at day 0 and 5 days after aerobic exposure

##### NDF Content (%) at day 0

| Genotype | Water-limited (75%) |                 |                  |                     |      | Well-watered (100%) |      |      |        |      | Effect ( <i>P</i> -value) |                  |                  |                      |                      |                       |                           |
|----------|---------------------|-----------------|------------------|---------------------|------|---------------------|------|------|--------|------|---------------------------|------------------|------------------|----------------------|----------------------|-----------------------|---------------------------|
|          | CTL <sup>1</sup>    | HI <sup>2</sup> | MOL <sup>3</sup> | MOL+HI <sup>4</sup> | SEM  | CTL                 | HI   | MOL  | MOL+HI | SEM  | Irr <sup>5</sup>          | Gen <sup>6</sup> | Add <sup>7</sup> | IrrxGen <sup>8</sup> | IrrxAdd <sup>9</sup> | GenxAdd <sup>10</sup> | IrrxGenxAdd <sup>11</sup> |
| RTC-2    | 63.1                | 66.6            | 64.9*            | 65.2                | 0.99 | 70.0                | 70.0 | 74.7 | 73.8   | 0.92 | <.0001                    | <.0001           | 0.1784           | <.0001               | 0.2621               | 0.0008                | 0.0069                    |
| RTC-119  | 62.7                | 64.2            | 68.2             | 53.6                | 2.14 | 60.8                | 64.9 | 63.8 | 62.3   | 0.94 |                           |                  |                  |                      |                      |                       |                           |
| RTC-361  | 61.9                | 61.4            | 58.1             | 64.0                | 0.97 | 64.0                | 61.7 | 62.8 | 61.2   | 0.64 |                           |                  |                  |                      |                      |                       |                           |
| RTC-400  | 62.4                | 64.7            | 62.5             | 63.8                | 0.59 | 68.9                | 69.5 | 69.3 | 70.4   | 0.38 |                           |                  |                  |                      |                      |                       |                           |

##### NDF Content (%) at day 5

| Genotype | Water-limited (75%) |                 |                  |                     |      | Well-watered (100%) |      |      |        |      | Effect ( <i>P</i> -value) |                  |                  |                      |                      |                       |                           |
|----------|---------------------|-----------------|------------------|---------------------|------|---------------------|------|------|--------|------|---------------------------|------------------|------------------|----------------------|----------------------|-----------------------|---------------------------|
|          | CTL <sup>1</sup>    | HI <sup>2</sup> | MOL <sup>3</sup> | MOL+HI <sup>4</sup> | SEM  | CTL                 | HI   | MOL  | MOL+HI | SEM  | Irr <sup>5</sup>          | Gen <sup>6</sup> | Add <sup>7</sup> | IrrxGen <sup>8</sup> | IrrxAdd <sup>9</sup> | GenxAdd <sup>10</sup> | IrrxGenxAdd <sup>11</sup> |
| RTC-2    | 64.2                | 66.4            | 68.0             | 64.6                | 0.90 | 70.9                | 71.9 | 74.1 | 70.9   | 0.63 | <.0001                    | <.0001           | 0.1378           | <.0001               | 0.3877               | 0.2874                | 0.7473                    |
| RTC-119  | 70.1                | 70.0            | 69.5             | 70.2                | 0.45 | 65.4                | 65.5 | 67.7 | 67.9   | 0.54 |                           |                  |                  |                      |                      |                       |                           |
| RTC-361  | 62.2                | 67.6            | 63.7             | 66.7                | 1.13 | 64.2                | 66.3 | 66.3 | 64.2   | 0.52 |                           |                  |                  |                      |                      |                       |                           |
| RTC-400  | 64.7*               | 67.3            | 65.4             | 65.4                | 0.64 | 72.5                | 71.2 | 70.7 | 72.1   | 0.57 |                           |                  |                  |                      |                      |                       |                           |

#### The effect of irrigation, genotype and additives on ADF content of tef silage at day 0 and 5 days after aerobic exposure

##### ADF Content (%) at day 0

| Genotype | Water-limited (75%) |                 |                  |                     |      | Well-watered (100%) |                    |                   |                   |      | Effect ( <i>P</i> -value) |                  |                  |                      |                      |                       |                           |
|----------|---------------------|-----------------|------------------|---------------------|------|---------------------|--------------------|-------------------|-------------------|------|---------------------------|------------------|------------------|----------------------|----------------------|-----------------------|---------------------------|
|          | CTL <sup>1</sup>    | HI <sup>2</sup> | MOL <sup>3</sup> | MOL+HI <sup>4</sup> | SEM  | CTL                 | HI                 | MOL               | MOL+HI            | SEM  | Irr <sup>5</sup>          | Gen <sup>6</sup> | Add <sup>7</sup> | IrrxGen <sup>8</sup> | IrrxAdd <sup>9</sup> | GenxAdd <sup>10</sup> | IrrxGenxAdd <sup>11</sup> |
| RTC-2    | 34.5                | 36.9            | 35.8*            | 36.7                | 0.88 | 39.7 <sup>bc</sup>  | 42.0 <sup>bc</sup> | 54.6 <sup>a</sup> | 44.0 <sup>b</sup> | 2.32 | <.0001                    | <.0001           | 0.7011           | <.0001               | 0.1912               | 0.0037                | 0.0008                    |

|         |                    |                    |                   |                   |      |      |      |      |      |      |
|---------|--------------------|--------------------|-------------------|-------------------|------|------|------|------|------|------|
| RTC-119 | 35.8a <sup>b</sup> | 34.9 <sup>ab</sup> | 38.9 <sup>a</sup> | 28.0 <sup>b</sup> | 1.54 | 30.9 | 33.1 | 32.9 | 34.5 | 0.69 |
| RTC-361 | 34.5               | 33.0               | 30.9              | 35.7              | 0.77 | 34.0 | 31.5 | 33.0 | 31.6 | 0.55 |
| RTC-400 | 34.6               | 33.8               | 33.0              | 34.6              | 0.52 | 38.9 | 38.8 | 38.3 | 38.8 | 0.32 |

#### ADF Content (%) at day 5

| Genotype | Water-limited (75%) |                 |                  |                     |      | Well-watered (100%) |      |      |        |      | Effect ( <i>P</i> -value) |                  |                  |                      |                      |                       |                           |
|----------|---------------------|-----------------|------------------|---------------------|------|---------------------|------|------|--------|------|---------------------------|------------------|------------------|----------------------|----------------------|-----------------------|---------------------------|
|          | CTL <sup>1</sup>    | HI <sup>2</sup> | MOL <sup>3</sup> | MOL+HI <sup>4</sup> | SEM  | CTL                 | HI   | MOL  | MOL+HI | SEM  | Irr <sup>5</sup>          | Gen <sup>6</sup> | Add <sup>7</sup> | IrrxGen <sup>8</sup> | IrrxAdd <sup>9</sup> | GenxAdd <sup>10</sup> | IrrxGenxAdd <sup>11</sup> |
| RTC-2    | 34.9*               | 36.2            | 37.6*            | 35.0                | 0.64 | 43.9                | 43.6 | 46.0 | 42.6   | 0.64 | <.0001                    | 0.0021           | 0.1519           | <.0001               | 0.1675               | 0.2588                | 0.6960                    |
| RTC-119  | 39.4                | 39.2            | 40.1             | 40.5                | 0.36 | 38.5                | 39.7 | 42.2 | 38.0   | 0.67 |                           |                  |                  |                      |                      |                       |                           |
| RTC-361  | 33.7                | 38.2            | 35.1             | 37.2                | 0.98 | 39.2                | 40.1 | 39.9 | 38.0   | 0.49 |                           |                  |                  |                      |                      |                       |                           |
| RTC-400  | 35.2*               | 36.2            | 35.5             | 34.6                | 0.53 | 44.5                | 41.8 | 41.2 | 41.6   | 0.57 |                           |                  |                  |                      |                      |                       |                           |

#### The effect of irrigation, genotype and additives on Hemicellulose content of tef silage at day 0 and 5 days after aerobic exposure

##### Hemicellulose Content (%) at day 0

| Genotype | Water-limited (75%) |                    |                   |                     |      | Well-watered (100%) |                   |                   |                   |      | Effect ( <i>P</i> -value) |                  |                  |                      |                      |                       |                           |
|----------|---------------------|--------------------|-------------------|---------------------|------|---------------------|-------------------|-------------------|-------------------|------|---------------------------|------------------|------------------|----------------------|----------------------|-----------------------|---------------------------|
|          | CTL <sup>1</sup>    | HI <sup>2</sup>    | MOL <sup>3</sup>  | MOL+HI <sup>4</sup> | SEM  | CTL                 | HI                | MOL               | MOL+HI            | SEM  | Irr <sup>5</sup>          | Gen <sup>6</sup> | Add <sup>7</sup> | IrrxGen <sup>8</sup> | IrrxAdd <sup>9</sup> | GenxAdd <sup>10</sup> | IrrxGenxAdd <sup>11</sup> |
| RTC-2    | 25.1                | 26.9               | 25.5              | 25.4                | 0.29 | 27.5                | 28.3              | 28.2              | 28.3              | 0.34 | <.0001                    | 0.0021           | 0.0093           | 0.0503               | 0.1126               | 0.0018                | 0.7292                    |
| RTC-119  | 24.4 <sup>ab</sup>  | 24.0 <sup>ab</sup> | 27.9 <sup>a</sup> | 18.9 <sup>bc</sup>  | 1.26 | 25.0 <sup>a</sup>   | 15.9 <sup>b</sup> | 23.1 <sup>a</sup> | 23.8 <sup>a</sup> | 1.50 |                           |                  |                  |                      |                      |                       |                           |
| RTC-361  | 26.4                | 24.4               | 24.4              | 26.0                | 0.69 | 27.0                | 24.5              | 26.4              | 24.5              | 0.54 |                           |                  |                  |                      |                      |                       |                           |
| RTC-400  | 24.9                | 25.8               | 24.9              | 25.3                | 0.34 | 28.6                | 27.8              | 27.6              | 27.6              | 0.38 |                           |                  |                  |                      |                      |                       |                           |

##### Hemicellulose Content (%) at day 5

| Genotype | Water-limited (75%) |                 |                  |                     |      | Well-watered (100%) |      |      |        |      | Effect ( <i>P</i> -value) |                  |                  |                      |                      |                       |                           |
|----------|---------------------|-----------------|------------------|---------------------|------|---------------------|------|------|--------|------|---------------------------|------------------|------------------|----------------------|----------------------|-----------------------|---------------------------|
|          | CTL <sup>1</sup>    | HI <sup>2</sup> | MOL <sup>3</sup> | MOL+HI <sup>4</sup> | SEM  | CTL                 | HI   | MOL  | MOL+HI | SEM  | Irr <sup>5</sup>          | Gen <sup>6</sup> | Add <sup>7</sup> | IrrxGen <sup>8</sup> | IrrxAdd <sup>9</sup> | GenxAdd <sup>10</sup> | IrrxGenxAdd <sup>11</sup> |
| RTC-2    | 28.8                | 29.3            | 29.4             | 29.0                | 0.22 | 28.5                | 33.0 | 32.3 | 31.0   | 0.93 | <.0001                    | <.0001           | <.0001           | <.0001               | 0.001                | 0.004                 | 0.0127                    |
| RTC-119  | 30.6                | 32.3            | 33.3             | 30.7                | 0.62 | 29.4                | 31.6 | 28.8 | 28.1   | 0.80 |                           |                  |                  |                      |                      |                       |                           |
| RTC-361  | 28.8                | 24.5            | 27.0             | 26.2                | 0.90 | 27.6                | 29.7 | 28.5 | 27.5   | 0.54 |                           |                  |                  |                      |                      |                       |                           |
| RTC-400  | 29.1                | 28.8            | 26.0             | 26.8                | 0.57 | 33.0                | 30.4 | 30.1 | 31.5   | 0.55 |                           |                  |                  |                      |                      |                       |                           |

#### The effect of irrigation, genotype and additives on Cellulose content of tef silage at day 0 and 5 days after aerobic exposure

##### Cellulose Content (%) at day 0

| Genotype | Water-limited (75%) |                 |                  |                     |      | Well-watered (100%) |      |      |        |      | Effect ( <i>P</i> -value) |                  |                  |                      |                      |                       |                           |
|----------|---------------------|-----------------|------------------|---------------------|------|---------------------|------|------|--------|------|---------------------------|------------------|------------------|----------------------|----------------------|-----------------------|---------------------------|
|          | CTL <sup>1</sup>    | HI <sup>2</sup> | MOL <sup>3</sup> | MOL+HI <sup>4</sup> | SEM  | CTL                 | HI   | MOL  | MOL+HI | SEM  | Irr <sup>5</sup>          | Gen <sup>6</sup> | Add <sup>7</sup> | IrrxGen <sup>8</sup> | IrrxAdd <sup>9</sup> | GenxAdd <sup>10</sup> | IrrxGenxAdd <sup>11</sup> |
| RTC-2    | 28.6                | 29.7            | 29.1             | 28.5                | 0.23 | 30.2                | 28.0 | 29.2 | 29.8   | 0.36 | 0.5967                    | 0.0006           | 0.321            | 0.0681               | 0.0489               | 0.0169                | 0.0311                    |
| RTC-119  | 26.9                | 29.3            | 29.3             | 25.6                | 0.80 | 29.9                | 31.8 | 31.0 | 27.8   | 0.63 |                           |                  |                  |                      |                      |                       |                           |

|         |      |      |      |      |      |      |      |      |      |      |
|---------|------|------|------|------|------|------|------|------|------|------|
| RTC-361 | 27.4 | 28.4 | 27.2 | 28.3 | 0.28 | 30.0 | 30.2 | 29.8 | 29.7 | 0.27 |
| RTC-400 | 27.9 | 30.9 | 29.4 | 29.2 | 0.44 | 30.0 | 30.7 | 31.0 | 31.6 | 0.27 |

#### Cellulose Content (%) at day 5

| Genotype | Water-limited (75%) |                 |                  |                     |      | Well-watered (100%) |                    |                     |                   |      | Effect ( <i>P</i> -value) |                  |                  |                      |                      |                       |                           |
|----------|---------------------|-----------------|------------------|---------------------|------|---------------------|--------------------|---------------------|-------------------|------|---------------------------|------------------|------------------|----------------------|----------------------|-----------------------|---------------------------|
|          | CTL <sup>1</sup>    | HI <sup>2</sup> | MOL <sup>3</sup> | MOL+HI <sup>4</sup> | SEM  | CTL                 | HI                 | MOL                 | MOL+HI            | SEM  | Irr <sup>5</sup>          | Gen <sup>6</sup> | Add <sup>7</sup> | IrrxGen <sup>8</sup> | IrrxAdd <sup>9</sup> | GenxAdd <sup>10</sup> | IrrxGenxAdd <sup>11</sup> |
| RTC-2    | 29.3                | 30.2            | 30.4             | 29.6                | 0.37 | 27.0                | 28.3               | 28.10               | 28.3              | 0.25 | 0.0119                    | 0.0001           | 0.497            | 0.0013               | 0.4613               | 0.227                 | 0.4103                    |
| RTC-119  | 30.7*               | 30.7*           | 29.4*            | 29.7                | 0.27 | 26.9 <sup>a</sup>   | 25.8 <sup>a</sup>  | 25.52 <sup>a</sup>  | 29.9 <sup>b</sup> | 0.68 |                           |                  |                  |                      |                      |                       |                           |
| RTC-361  | 28.6*               | 29.5*           | 28.6*            | 29.6*               | 0.20 | 25.0                | 26.3               | 26.31               | 26.2              | 0.20 |                           |                  |                  |                      |                      |                       |                           |
| RTC-400  | 29.5                | 31.1            | 29.9             | 30.7                | 0.26 | 28.0 <sup>bc</sup>  | 29.3 <sup>ab</sup> | 29.48 <sup>ab</sup> | 30.6 <sup>a</sup> | 0.28 |                           |                  |                  |                      |                      |                       |                           |

#### The effect of irrigation, genotype and additives on ADL content of tef silage at day 0 and 5 days after aerobic exposure

##### ADL Content (%) at day 0

| Genotype | Water-limited (75%) |                   |                   |                     |      | Well-watered (100%) |                    |                   |                    |      | Effect ( <i>P</i> -value) |                  |                  |                      |                      |                       |                           |
|----------|---------------------|-------------------|-------------------|---------------------|------|---------------------|--------------------|-------------------|--------------------|------|---------------------------|------------------|------------------|----------------------|----------------------|-----------------------|---------------------------|
|          | CTL <sup>1</sup>    | HI <sup>2</sup>   | MOL <sup>3</sup>  | MOL+HI <sup>4</sup> | SEM  | CTL                 | HI                 | MOL               | MOL+HI             | SEM  | Irr <sup>5</sup>          | Gen <sup>6</sup> | Add <sup>7</sup> | IrrxGen <sup>8</sup> | IrrxAdd <sup>9</sup> | GenxAdd <sup>10</sup> | IrrxGenxAdd <sup>11</sup> |
| RTC-2    | 9.4 <sup>ab</sup>   | 6.1 <sup>*a</sup> | 10.2 <sup>b</sup> | 11.0 <sup>*b</sup>  | 0.75 | 11.0 <sup>c</sup>   | 12.1 <sup>bc</sup> | 16.4 <sup>a</sup> | 11.7 <sup>bc</sup> | 0.79 | 0.0013                    | <.0001           | 0.0193           | <.0001               | <.0001               | <.0001                | <.0001                    |
| RTC-119  | 10.6*               | 10.2*             | 10.0              | 8.4                 | 0.36 | 5.4 <sup>a</sup>    | 14.9 <sup>bc</sup> | 6.6 <sup>c</sup>  | 9.9 <sup>c</sup>   | 1.40 |                           |                  |                  |                      |                      |                       |                           |
| RTC-361  | 7.9                 | 8.0               | 6.2               | 9.3                 | 0.47 | 6.7                 | 6.7                | 6.2               | 6.6                | 0.17 |                           |                  |                  |                      |                      |                       |                           |
| RTC-400  | 9.5                 | 7.7               | 6.5               | 9.0                 | 0.46 | 9.3                 | 9.8                | 8.1               | 9.9                | 0.30 |                           |                  |                  |                      |                      |                       |                           |

##### ADL Content (%) at day 5

| Genotype | Water-limited (75%) |                 |                  |                     |      | Well-watered (100%) |      |      |        |      | Effect ( <i>P</i> -value) |                  |                  |                      |                      |                       |                           |
|----------|---------------------|-----------------|------------------|---------------------|------|---------------------|------|------|--------|------|---------------------------|------------------|------------------|----------------------|----------------------|-----------------------|---------------------------|
|          | CTL <sup>1</sup>    | HI <sup>2</sup> | MOL <sup>3</sup> | MOL+HI <sup>4</sup> | SEM  | CTL                 | HI   | MOL  | MOL+HI | SEM  | Irr <sup>5</sup>          | Gen <sup>6</sup> | Add <sup>7</sup> | IrrxGen <sup>8</sup> | IrrxAdd <sup>9</sup> | GenxAdd <sup>10</sup> | IrrxGenxAdd <sup>11</sup> |
| RTC-2    | 5.6*                | 6.6             | 7.7              | 5.9                 | 0.54 | 14.3                | 9.8  | 13.1 | 11.0   | 1.15 | <.0001                    | 0.3104           | 0.4615           | 0.0462               | 0.0168               | 0.2229                | 0.1304                    |
| RTC-119  | 8.0                 | 6.4             | 6.4              | 9.0                 | 0.58 | 8.9                 | 7.7  | 12.6 | 9.0    | 0.90 |                           |                  |                  |                      |                      |                       |                           |
| RTC-361  | 4.6                 | 13.1            | 7.6              | 10.6                | 1.24 | 11.4                | 9.9  | 11.1 | 10.1   | 0.45 |                           |                  |                  |                      |                      |                       |                           |
| RTC-400  | 5.9                 | 7.1             | 9.2              | 7.4                 | 0.55 | 10.7                | 10.7 | 10.5 | 9.3    | 0.54 |                           |                  |                  |                      |                      |                       |                           |

#### The effect of irrigation, genotype and additives on % DM loss of tef silage at day 0 and 5 days after aerobic exposure

##### DM Loss (%) at day 0

| Genotype | Water-limited (75%) |                 |                  |                     |      | Well-watered (100%) |                   |                   |                  |      | Effect ( <i>P</i> -value) |                  |                  |                      |                      |                       |                           |
|----------|---------------------|-----------------|------------------|---------------------|------|---------------------|-------------------|-------------------|------------------|------|---------------------------|------------------|------------------|----------------------|----------------------|-----------------------|---------------------------|
|          | CTL <sup>1</sup>    | HI <sup>2</sup> | MOL <sup>3</sup> | MOL+HI <sup>4</sup> | SEM  | CTL                 | HI                | MOL               | MOL+HI           | SEM  | Irr <sup>5</sup>          | Gen <sup>6</sup> | Add <sup>7</sup> | IrrxGen <sup>8</sup> | IrrxAdd <sup>9</sup> | GenxAdd <sup>10</sup> | IrrxGenxAdd <sup>11</sup> |
| RTC-2    | 1.4                 | 1.9             | 1.7              | 1.7*                | 0.07 | 2.0                 | 2.1               | 2.0               | 1.8              | 0.06 | 0.046                     | 0.346            | 0.0222           | <.0001               | <.0001               | 0.796                 | 0.7716                    |
| RTC-119  | 1.8                 | 2.2             | 1.9              | 2.1                 | 0.08 | 1.6 <sup>ab</sup>   | 1.6 <sup>ab</sup> | 1.6 <sup>ab</sup> | 1.1 <sup>a</sup> | 0.08 |                           |                  |                  |                      |                      |                       |                           |
| RTC-361  | 1.5*                | 1.8             | 1.6              | 1.7                 | 0.05 | 2.3                 | 2.2               | 2.0               | 2.0              | 0.05 |                           |                  |                  |                      |                      |                       |                           |



|         |      |     |     |     |      |     |     |     |     |      |
|---------|------|-----|-----|-----|------|-----|-----|-----|-----|------|
| RTC-400 | 1.3* | 2.1 | 1.7 | 1.9 | 0.11 | 2.2 | 2.0 | 1.8 | 2.0 | 0.08 |
|---------|------|-----|-----|-----|------|-----|-----|-----|-----|------|

# DM Loss (%) at day 5

| Genotype | Water-limited (75%) |                 |                  |                     |      | Well-watered (100%) |     |     |        |      | Effect ( <i>P</i> -value) |                  |                  |                      |                      |                       |                           |
|----------|---------------------|-----------------|------------------|---------------------|------|---------------------|-----|-----|--------|------|---------------------------|------------------|------------------|----------------------|----------------------|-----------------------|---------------------------|
|          | CTL <sup>1</sup>    | HI <sup>2</sup> | MOL <sup>3</sup> | MOL+HI <sup>4</sup> | SEM  | CTL                 | HI  | MOL | MOL+HI | SEM  | Irr <sup>5</sup>          | Gen <sup>6</sup> | Add <sup>7</sup> | IrrxGen <sup>8</sup> | IrrxAdd <sup>9</sup> | GenxAdd <sup>10</sup> | IrrxGenxAdd <sup>11</sup> |
| RTC-2    | 3.2                 | 3.3             | 3.5              | 3.3                 | 0.06 | 2.9                 | 3.1 | 3.0 | 3.3    | 0.07 | 0.0296                    | 0.0007           | 0.7096           | <.0001               | 0.3728               | 0.6214                | 0.1562                    |
| RTC-119  | 3.3                 | 3.5             | 3.4              | 3.7                 | 0.08 | 3.4                 | 3.1 | 3.3 | 2.7    | 0.16 |                           |                  |                  |                      |                      |                       |                           |
| RTC-361  | 2.8*                | 3.3             | 3.1              | 3.4                 | 0.10 | 4.6                 | 4.3 | 3.9 | 4.0    | 0.13 |                           |                  |                  |                      |                      |                       |                           |
| RTC-400  | 3.5                 | 3.3             | 2.8              | 3.2                 | 0.11 | 3.5                 | 3.3 | 3.3 | 3.6    | 0.09 |                           |                  |                  |                      |                      |                       |                           |

**Moulds and Yeast did not grow on tef silage.**

**The carbondioxide emitted form tef silage did not reach the minimal detection levels.**

\*Significant differences between irrigation regimes within the same treatment at  $P < 0.05$  after Tukey HSD test, Least Square Means not connected by the same letters between treatments within the same irrigation regime are statistically different at  $P < 0.05$  after Tukey HSD test, SEM: Standard error of the mean, CTL<sup>1</sup> – Control, HI<sup>2</sup> – Heterofermentative Inoculum, MOL<sup>3</sup> - Molasses, MOL+HI<sup>4</sup> – Molasses+ Heterofermentative Inoculum,, Irr – Irrigation<sup>5</sup>, Gen<sup>6</sup>– Genotype, Add<sup>7</sup> – Additive, IrrxGen<sup>8</sup> - Irrigation genotype interaction, IrrxAdd<sup>9</sup> - Irrigation additive interaction and GenxAdd<sup>10</sup> -Genotype additive interaction and IrrxGenxAdd<sup>11</sup> – Irrigation, genotype and additive interaction.
